# Supplementary material for: IgG3 enhances neutralization potency and Fc effector function of an HIV V2-specific broadly neutralizing antibody
Source: PubMed Central journal article supplement (PMC6936867; doi:10.1371/journal.ppat.1008064), 2019-12-16
Supplement: ppat.1008064.s001.pdf [file ppat.1008064.s001.pdf]

CAP256 36 months p.i

|             | Undepleted (IC <sub>50</sub> µg/ml) | IgG3 depleted (IC <sub>50</sub> µg/ml) | Fold reduction |
|-------------|-------------------------------------|----------------------------------------|----------------|
| CAP256_SU   | 1.1                                 | 2.4                                    | 2.2            |
| ZM53.12     | 1.8                                 | 8.0                                    | 4.5            |
| ConC        | 1.8                                 | 10.7                                   | 5.9            |
| CAP45.G3    | 2.9                                 | >25                                    | KO             |
| CAP210.E8   | 3.7                                 | 17.0                                   | 4.6            |
| BG505 N332+ | 13.9                                | >25                                    | KO             |
| Q23.17      | 14.1                                | >25                                    | KO             |
| MLV         | >25                                 | >25                                    | -              |

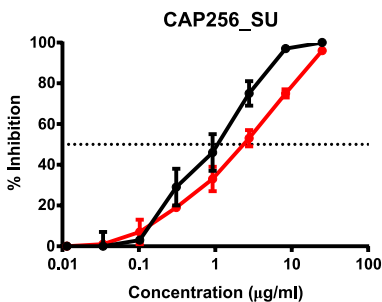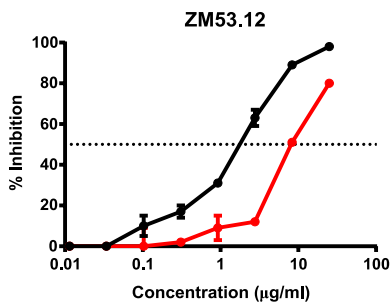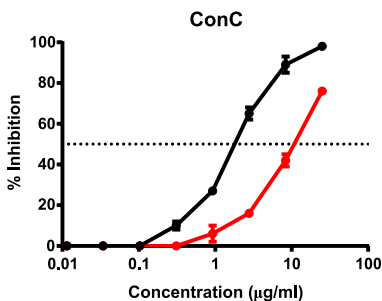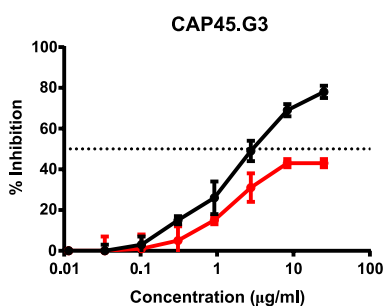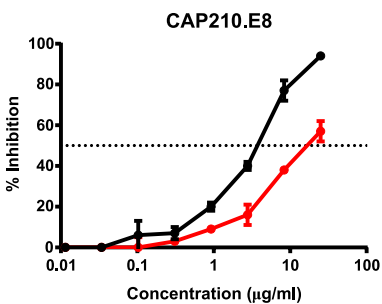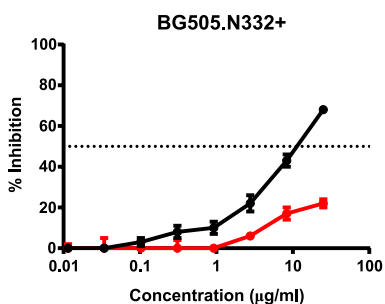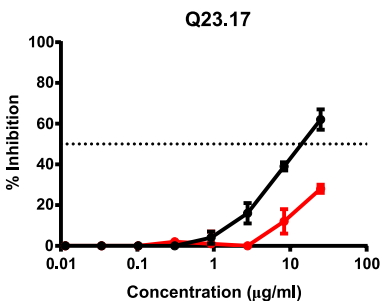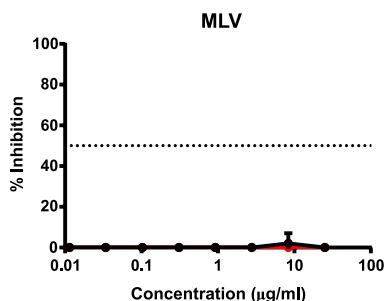

● Undepleted

● IgG3 depleted
