# Supplementary material for: IgG3 enhances neutralization potency and Fc effector function of an HIV V2-specific broadly neutralizing antibody
Source: PubMed Central journal article supplement (PMC6936867; doi:10.1371/journal.ppat.1008064), 2019-12-16
Supplement: ppat.1008064.s002.pdf [file ppat.1008064.s002.pdf]

### CH1

CAP256 germline IgG3 SNPs  
 IGHG3\*01  
 CAP256.29 bNAb  
 CAP256.30 bNAb  
 CAP256.33 bNAb  
 IGHG3\*17  
 1A2  
 1B10  
 1G2  
 1H

|                                                                            | 192 | 193 |
|----------------------------------------------------------------------------|-----|-----|
| ASTKGPSVFPLAPCSRSTSGGTAALGCLVKDYFPEPVTVSWNSGALTSGVHTFPAVLQSSGLYSLSSVVTVPSS | N/S | F/L |
| .....                                                                      | S   | L   |
| .....                                                                      | S   | L   |
| .....                                                                      | S   | L   |
| .....                                                                      | S   | L   |
| .....                                                                      | N   | F   |
| .....                                                                      | N   | F   |
| .....                                                                      | N   | F   |
| .....                                                                      | N   | F   |
| .....                                                                      | N   | F   |

### CH2

CAP256 germline IgG3 SNPs  
 IGHG3\*01  
 CAP256.29 bNAb  
 IGHG3\*17  
 1A2  
 1B10  
 1G2  
 1H

|                                                                                                                   |  |
|-------------------------------------------------------------------------------------------------------------------|--|
| APELLGGPSVFLFPPPKKDKTLMISRTPEVTCVVVDVSHEDPEVQFKWYVDGVEVHNAKTKPREEQYNSTFRVVSVLTVLHQDWLNGKEYKCKVSNKALPAPIEKTISKTKGQ |  |
| .....                                                                                                             |  |
| .....                                                                                                             |  |
| .....                                                                                                             |  |
| .....                                                                                                             |  |
| .....                                                                                                             |  |
| .....                                                                                                             |  |
| .....                                                                                                             |  |
| .....                                                                                                             |  |
| .....                                                                                                             |  |

### CH3

CAP256 germline IgG3 SNPs  
 IGHG3\*01  
 CAP256.29 bNAb  
 IGHG3\*17  
 1A2  
 1B10  
 1G2  
 1H

|                                      | 379 | 392          | 397 | 419   |     |                       |     |    |
|--------------------------------------|-----|--------------|-----|-------|-----|-----------------------|-----|----|
| PREPQVYTLPPSREEMTKNQVSLTCLVKGFYPSDIA | M/V | EWESSGQPENNY | K/N | TTPP  | V/M | LDSGGSFFLYSKLTVDKSRWQ | Q/E | GN |
| .....                                | V   | .....        | N   | ..... | M   | .....                 | Q   | .. |
| .....                                | V   | .....        | N   | ..... | M   | .....                 | E   | .. |
| .....                                | M   | .....        | K   | ..... | V   | .....                 | Q   | .. |
| .....                                | M   | .....        | K   | ..... | V   | .....                 | Q   | .. |
| .....                                | M   | .....        | K   | ..... | V   | .....                 | Q   | .. |
| .....                                | M   | .....        | K   | ..... | V   | .....                 | Q   | .. |
| .....                                | M   | .....        | K   | ..... | V   | .....                 | Q   | .. |

435 436

CAP256 germline IgG3 SNPs  
 IGHG3\*01  
 IGHG3\*17

|              |     |     |             |
|--------------|-----|-----|-------------|
| IFSCVMHEALHN | H/R | Y/F | TQKSLSLSPGK |
| .....        | R   | F   | .....       |
| .....        | H   | Y   | .....       |
