# Supplementary material for: IgG3 enhances neutralization potency and Fc effector function of an HIV V2-specific broadly neutralizing antibody
Source: PubMed Central journal article supplement (PMC6936867; doi:10.1371/journal.ppat.1008064), 2019-12-16
Supplement: ppat.1008064.s004.pdf [file ppat.1008064.s004.pdf]

## CAP256.29

## CAP256.25

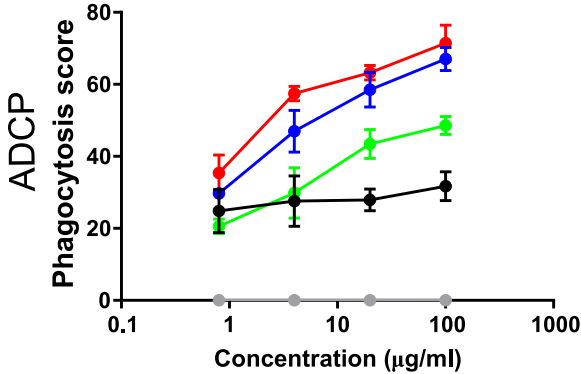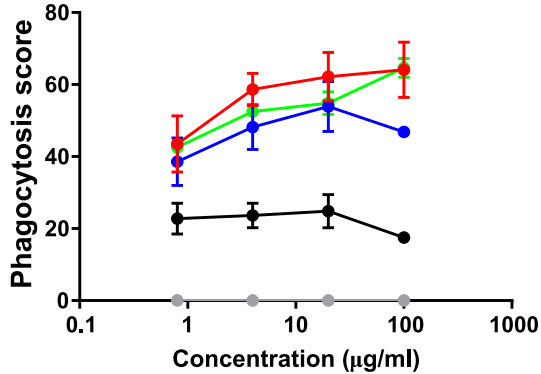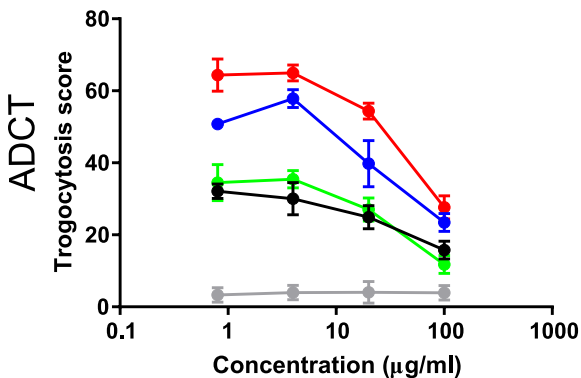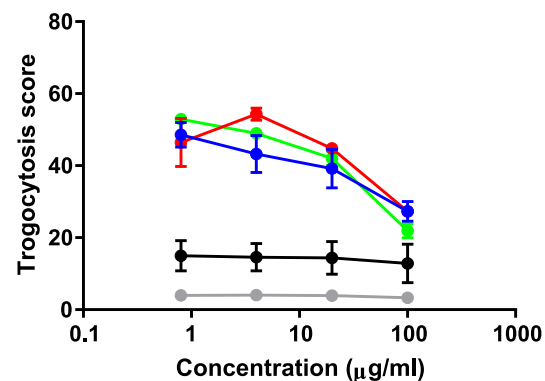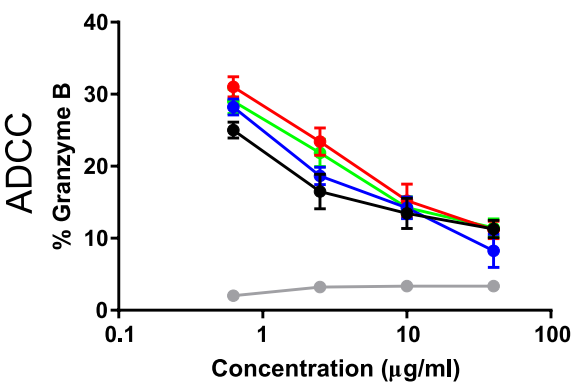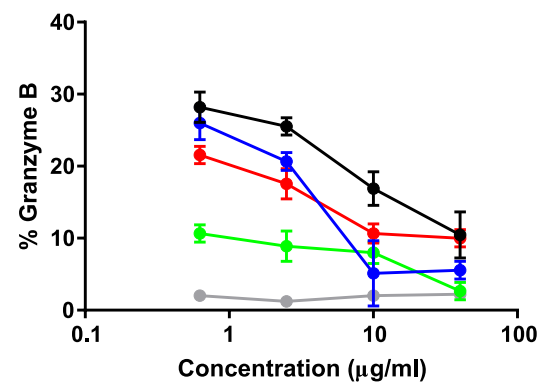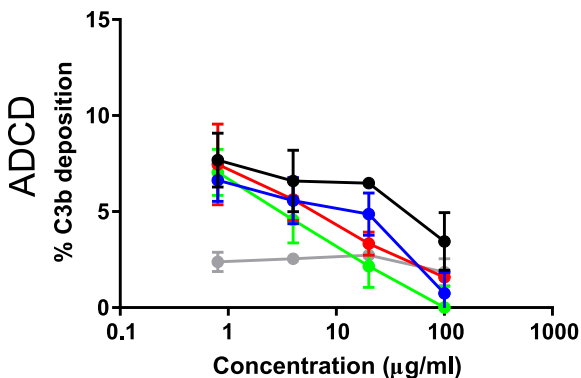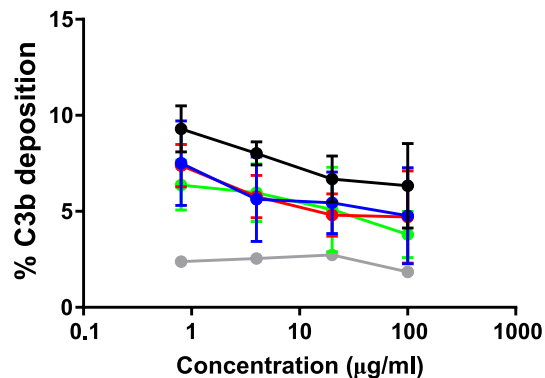

● IgG1 ● IgG3\*01 ● IgG3\*01m ● IgG3\*17 ● Palivizumab
