# Supplementary material for: IgG3 enhances neutralization potency and Fc effector function of an HIV V2-specific broadly neutralizing antibody
Source: PubMed Central journal article supplement (PMC6936867; doi:10.1371/journal.ppat.1008064), 2019-12-16
Supplement: ppat.1008064.s005.pdf [file ppat.1008064.s005.pdf]

A

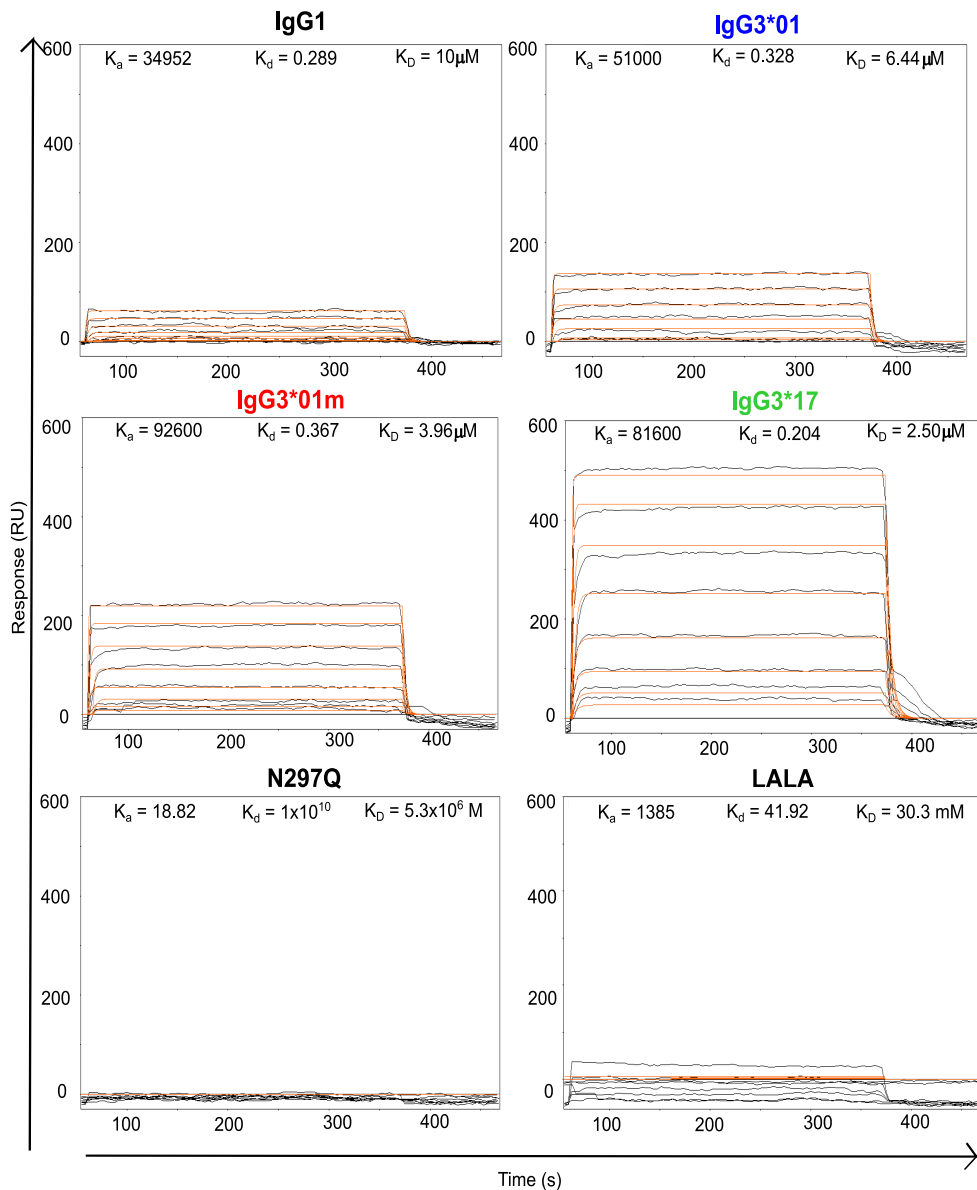

B

| Receptor      | Function  | CAP256.29 $K_D$ ( $\mu\text{M}$ ) |           |           |           | Controls $K_D$ ( $\mu\text{M}$ ) |             | CAP256.25 $K_D$ ( $\mu\text{M}$ ) |           |           |           |
|---------------|-----------|-----------------------------------|-----------|-----------|-----------|----------------------------------|-------------|-----------------------------------|-----------|-----------|-----------|
|               |           | IgG1                              | IgG3*01   | IgG3*01m  | IgG3*17   | N297Q                            | CAP256 plgG | IgG1                              | IgG3*01   | IgG3*01m  | IgG3*17   |
| FcγRIIa H131  | ADCT/ADCP | 5.5 ± 0.8                         | 1.3 ± 0.1 | 1.4 ± 0.1 | 1.3 ± 0.1 | -                                | 5.8 ± 0.8   | 5.6 ± 0.8                         | 1.0 ± 0.1 | 1.0 ± 0.1 | 1.0 ± 0.1 |
| FcγRIIa R131  | ADCT/ADCP | 5.2 ± 0.8                         | 3.0 ± 0.2 | 3.2 ± 0.1 | 2.9 ± 0.3 | -                                | 4.6 ± 0.6   | 5.7 ± 0.2                         | 3.9 ± 0.2 | 2.8 ± 0.1 | 2.0 ± 0.1 |
| FcγRIIb       | ADCT/ADCP | 5.4 ± 0.3                         | 3.1 ± 0.5 | 3.4 ± 0.5 | 4.1 ± 0.6 | -                                | 5.3 ± 0.6   | 6.6 ± 0.8                         | 4.6 ± 0.4 | 4.8 ± 0.5 | 4.5 ± 0.4 |
| FcγRIIIa F158 | ADCC      | 4.5 ± 0.5                         | 4.4 ± 0.7 | 3.9 ± 0.3 | 4.5 ± 0.7 | -                                | 4.5 ± 0.6   | 3.9 ± 0.5                         | 3.1 ± 0.1 | 3.0 ± 0.1 | 4.9 ± 0.1 |
| FcγRIIIa V158 | ADCC      | 3.6 ± 0.5                         | 2.6 ± 0.1 | 2.7 ± 0.2 | 2.4 ± 0.3 | -                                | 2.2 ± 0.3   | 2.4 ± 0.3                         | 2.2 ± 0.2 | 2.1 ± 0.3 | 4.1 ± 0.5 |
