# Supplementary material for: IgG3 enhances neutralization potency and Fc effector function of an HIV V2-specific broadly neutralizing antibody
Source: PubMed Central journal article supplement (PMC6936867; doi:10.1371/journal.ppat.1008064), 2019-12-16

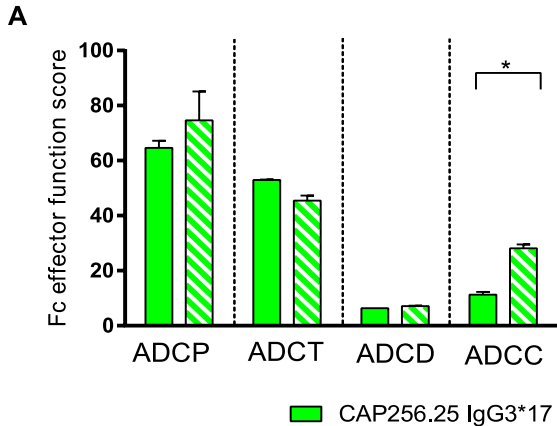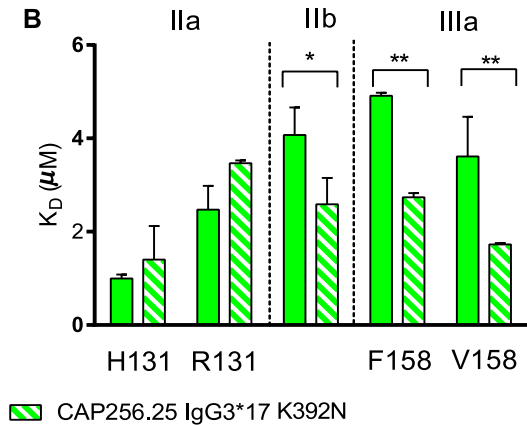

Supplement: ppat.1008064.s006.pdf [file ppat.1008064.s006.pdf]
